# Supplementary material for: Vitrified canine testicular cells allow the formation of spermatogonial stem cells and seminiferous tubules following their xenotransplantation into nude mice
Source: PubMed Central journal article supplement (PMC4764824; doi:10.1038/srep21919), 2016-02-24
Supplement: srep21919-s1.pdf [file srep21919-s1.pdf]

1           **Vitrified canine testicular cells allow the formation of**  
2           **spermatogonial stem cells and seminiferous tubules following**  
3           **their xenotransplantation into nude mice**

4   Kyung Hoon Lee<sup>1</sup>, Won Young Lee<sup>2</sup>, Dong Hoon Kim<sup>3</sup>, Seung Hoon Lee<sup>3</sup>, Jung Tae  
5   Do<sup>1</sup>, Chan Kyu park<sup>1</sup>, Jae Hwan Kim<sup>4</sup>, Young Suk Choi<sup>4</sup> and Hyuk Song<sup>1\*</sup>

6  
7   <sup>1</sup>Department of Animal Biotechnology, Konkuk University, 1 Hwayang-dong,  
8   Gwangjin-gu, Seoul 143-701, Republic of Korea

9   <sup>2</sup> Department of Food Bioscience, RIBH, College of Biomedical & Health Science,  
10   Konkuk University, Chung-ju 380-701, Republic of Korea

11   <sup>3</sup> Animal Biotechnology Division, National Institute of Animal Science, RDA, Wanju-  
12   gun 565-851, Republic of Korea

13   <sup>4</sup>Department of Biomedical Science, College of Life Science, CHA University,  
14   Seongnam 463-836, Korea

15   \*Corresponding author: Hyuk Song (PhD), Department of Animal Biotechnology,  
16   College of Animal Bioscience and Technology, Konkuk University, Seoul 143-701,  
17   Korea

18   E-mail: [songh@konkuk.ac.kr](mailto:songh@konkuk.ac.kr), Tel: [+82-2-450-0562](tel:+82-2-450-0562), Fax: [+82-2-450-1044](tel:+82-2-450-1044)

19   Short title: Germ cell culture and xenotransplantation in BM

20

21 **Supplementary figure legend**

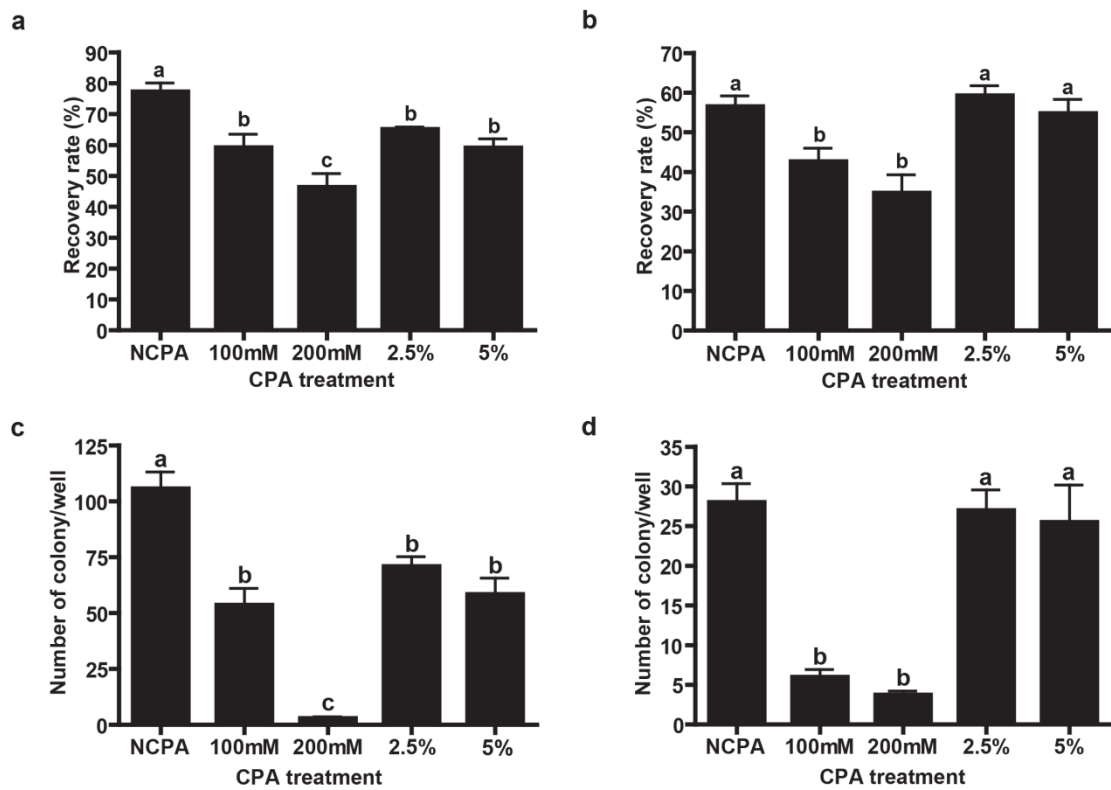

22

23 **Supplementary Figure 1.** Effect of cryoprotective agents on the recovery rate of

24 cryopreserved testicular cells and the colony number in two-month-old beagle testis.

25 Total testicular cells were thawed after cryopreservation for three months. Recovery rate

26 of testicular cells cryopreserved in StemPro-34 (a) and DMEM-FBS (b) medium with

27 DMSO (final concentration=10%) and different cryoprotective agents. The number of

28 colonies in StemPro-34 medium after thawing from StemPro-34 (c) and DMEM-FBS (d)

29 medium with DMSO and different cryoprotective agents. NCPA, non-cryoprotective

30 agent group; 100mM, 100mM trehalose-added group; 200mM, 200mM trehalose-added

31 group; 2.5%, 2.5% PEG-added group; 5%, 5% PEG-added group.  $P < 0.05$ .

32

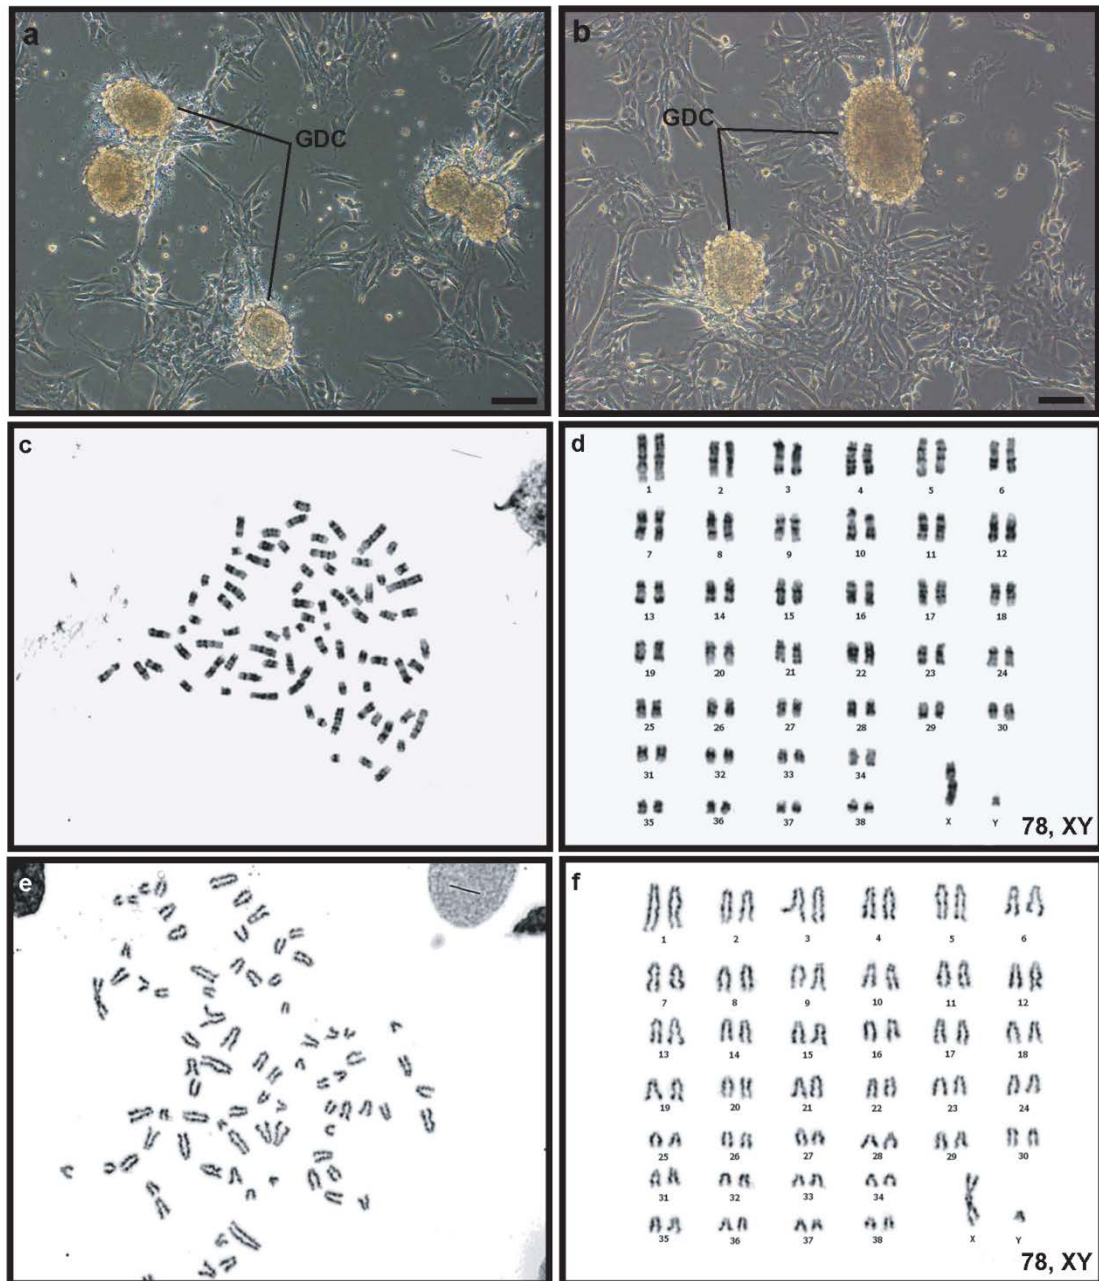

33

34 **Supplementary Figure 2.** Colony culturing using primary and cryopreserved testicular  
 35 cells and karyotyping of cryopreserved two-month-old beagle testis testicular cells  
 36 colony after thawing.

37 Morphology of primary cells GDCs in culture (a) and testicular cells previously  
 38 cryopreserved in StemPro-34 and DMSO (b). Karyotypes of colonies from primary  
 39 cultures (c and d) and cryopreserved (e and f) testicular cell cultures after thawing.  
 40 Panel c and e indicate G-banded metaphase spread of the primary and cryopreserved

41 testicular cells culture, respectively. Scale bars are 100  $\mu\text{m}$  and magnification is  $\times 100$  in  
42 panel A and B. GDC, germ cell-derived colony.
